# Supplementary material for: Mitochondrial Changes in β0-Thalassemia/Hb E Disease
Source: PubMed Central journal article supplement (PMC4836671; doi:10.1371/journal.pone.0153831), 2016-04-19
Supplement: pone.0153831.s001.pdf [file pone.0153831.s001.pdf]

## S1 File

### Mitochondrial Changes in $\beta^0$ -Thalassemia/Hb E Disease

Kornpat Khungwanmaythawee<sup>1</sup>, Wannapa Sornjai<sup>1</sup>, Atchara Paemanee<sup>1,2</sup>, Janejira Jaratsittisin<sup>1</sup>, Suthat Fucharoen<sup>1</sup>, Saovaros Svasti<sup>1</sup>, Pathrapol Lithanatudom<sup>3</sup>, Sittiruk Roytrakul<sup>2</sup> and Duncan R. Smith<sup>1\*</sup>

<sup>1</sup>Institute of Molecular Biosciences, Mahidol University, Salaya campus, 25/25 Phuttamonton Sai 4, Salaya, Nakorn Pathom, Thailand 73170

<sup>2</sup>National Center for Genetic Engineering and Biotechnology (BIOTEC), National Science and Technology Development Agency, 113 Thailand Science Park, Phahonyothin Road, Khlong Nueng, Khlong Luang, Pathum Thani, Thailand 12120

<sup>3</sup>Department of Biology, Faculty of Science, Chiang Mai University, 239 Huay Kaew Rd., Suthep, Muang, Chiang Mai, Thailand 50202

\*Corresponding author

Email: duncan.smi@mahidol.ac.th, duncan\_r\_smith@hotmail.com (DRS)

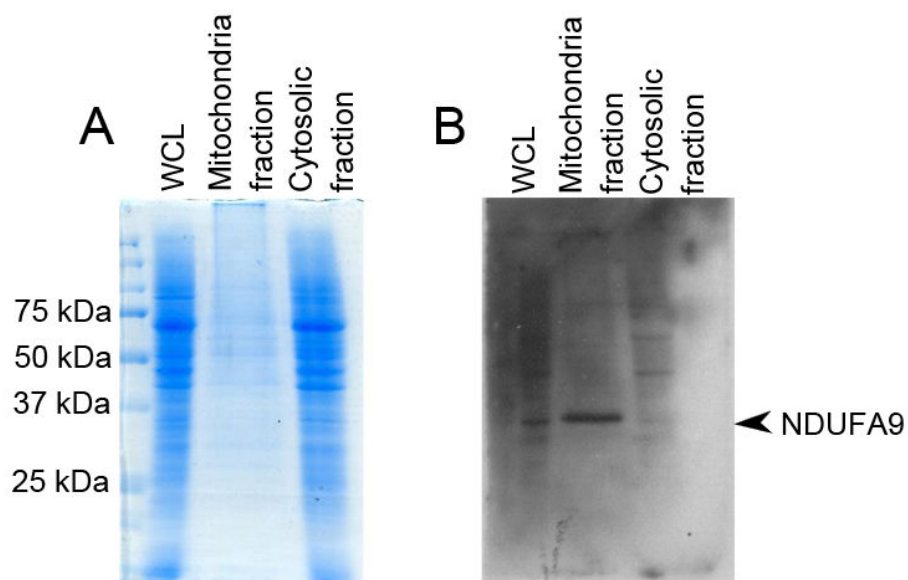

**Fig A. Western blot analysis of mitochondrial protein enrichment.**

Proteins were extracted from whole cell lysate (WCL), purified mitochondria and the cytosolic fraction obtained during the mitochondrial purification, and after electrophoresis through a 12.5% polyacrylamide gel were analyzed by (A) Coomassie blue staining and (B) Western blot analysis to detect the presence of NADH:ubiquinone oxidoreductase subunit A9 (NDUFA9). Representative size markers are indicated.

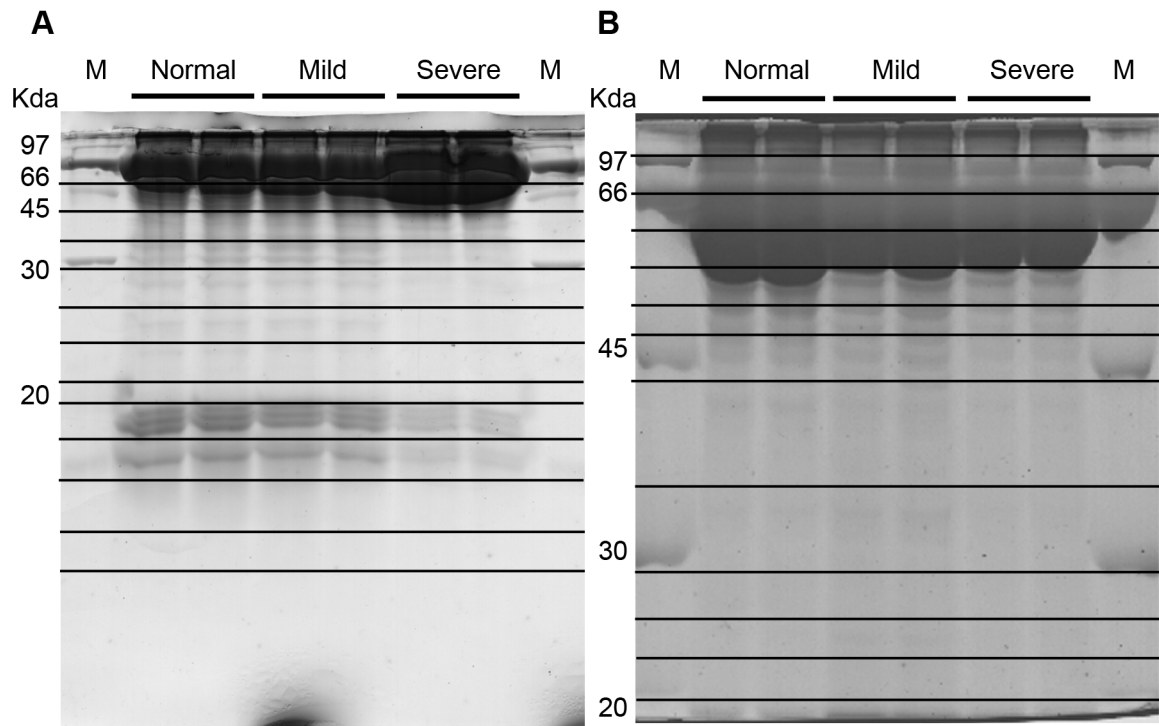

**Fig B. SDS-PAGE of mitochondria enriched proteins.**

Pools of mitochondrial protein enriched samples were prepared from 5 normal controls, 5 mild and 5 severe b-thalassemia/Hb E patients. A total of 50  $\mu\text{g}$  from each pool was separated in duplicate by electrophoresis through (a) 12.5% or (b) 10% SDS-PAGE gels. After electrophoresis gels were stained with colloidal coomassie blue and each lane was cut into groups according to size of separated proteins as indicated. Each slice of gel was cut into 1 mm<sup>3</sup> cubes and these gel plugs were subjected to tryptic digestion before MS/MS analysis.

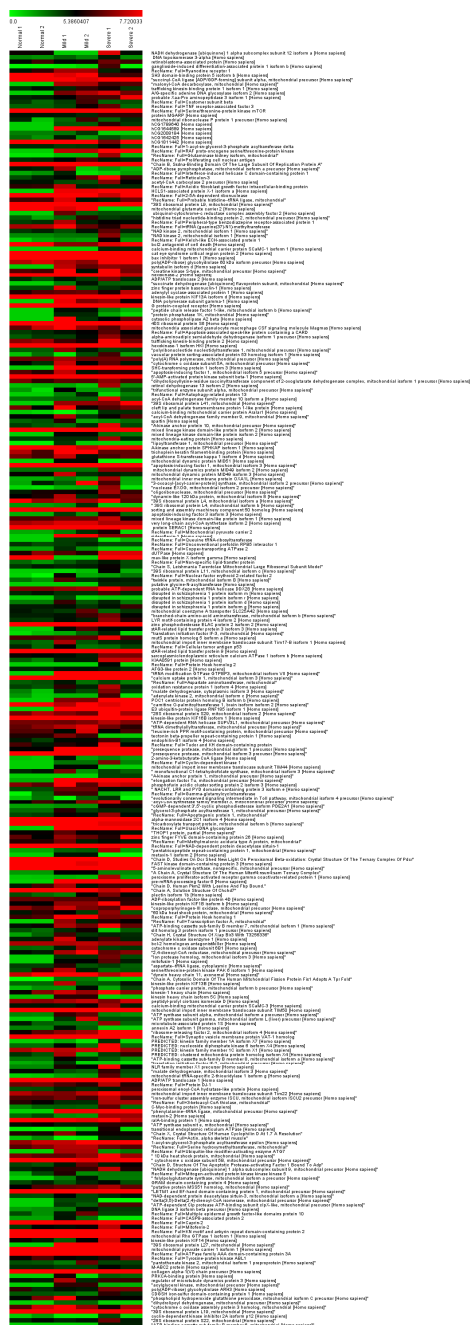

**Fig C. Hierarchical clustering analysis of 288 mitochondrial proteins.**

Proteins were identified after GeLC-MS/MS spectra were searched against the Mitoproteome database. The data was generated by duplicate analysis of a pool of samples from 5 individuals (normal controls, mild and severe  $\beta$ -thalassemia/Hb E). The color scale is shown by the bar at the top.

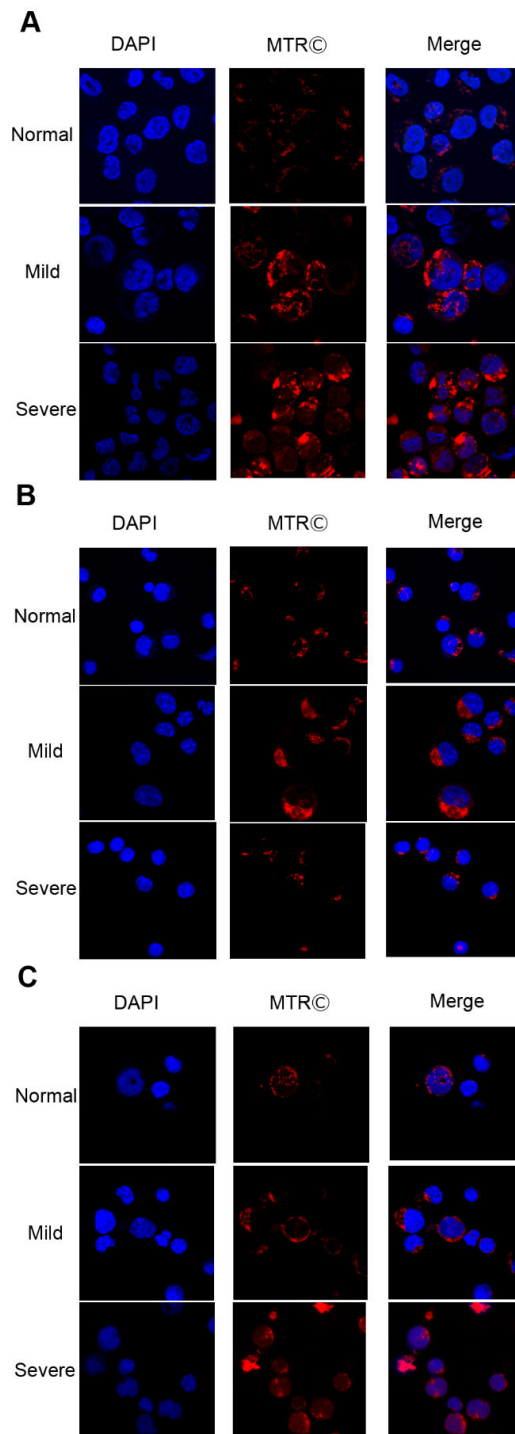

**Fig D. Original unmerged and merged images from Fig 3.**

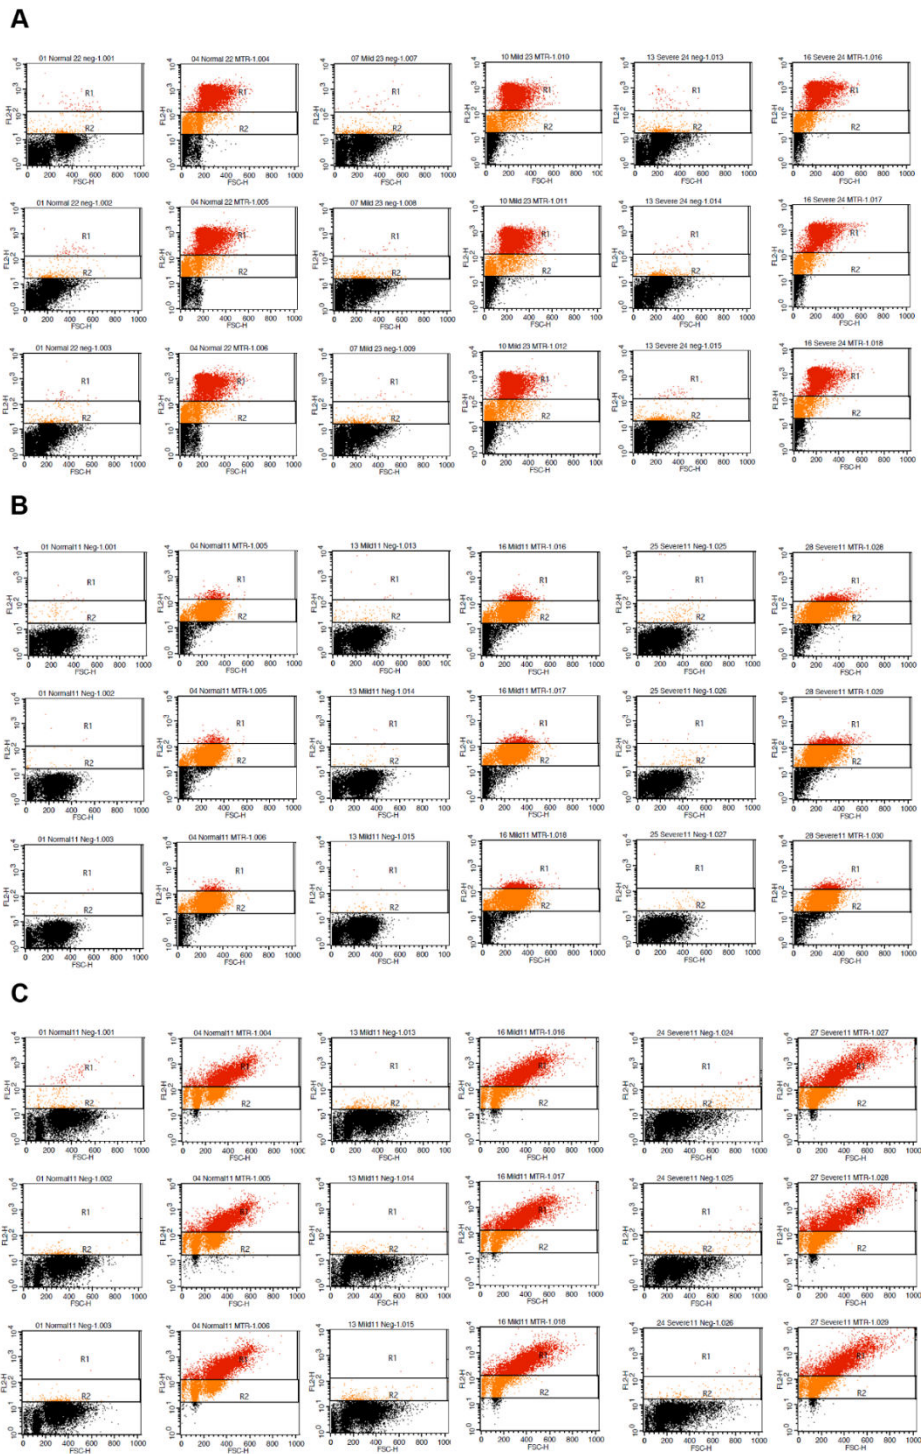

**Fig E. Original scatterplots of flow cytometry as presented in Figure 3.**

**Table A. Specific primer sequences and cycle conditions**

| <b>Gene</b>       | <b>Primer sequence<br/>(forward and reverse)</b> | <b>PCR condition</b> |           | <b>Size<br/>(bp)</b> |
|-------------------|--------------------------------------------------|----------------------|-----------|----------------------|
| <b>mtATP6-RNA</b> | 5'-CTCTATTGATCCCCACCTCC-3'                       | 95.0°C, 10 sec       |           | 308                  |
|                   | 5'-TGGTAAGAAGTGGGCTAGGG-3'                       | 60.0°C, 30 sec       | 40 cycles |                      |
| <b>mtATP8-RNA</b> | 5'-ATGCCCCAACTAAATACTACCG-3'                     | 95.0°C, 10 sec       |           | 198                  |
|                   | 5'-TGGGGGCAATGAATGAAGCG-3'                       | 60.0°C, 30 sec       | 40 cycles |                      |
| <b>mtCYTB-RNA</b> | 5'-GCCCTCGGCTTACTTCTCTT-3'                       | 95.0°C, 10 sec       |           | 287                  |
|                   | 5'-AGTGATTGGCTTAGTGGGCG-3'                       | 60.0°C, 30 sec       | 40 cycles |                      |
| <b>Actin-RNA</b>  | 5'-ACCAACTGGGACGACATGGAGAAA-3'                   | 95.0°C, 10 sec       |           | 192                  |
|                   | 5'-TAGCACAGCCTGGATAGCAACGTA-3'                   | 60.0°C, 30 sec       | 40 cycles |                      |
| <b>mtCYTB-DNA</b> | 5'-AACTTCGGCTCACTCCTTGG-3'                       | 95.0°C, 10 sec       |           | 377                  |
|                   | 5'-CCAATGTATGGGATGGCGGA-3'                       | 60.0°C, 30 sec       | 40 cycles |                      |
| <b>FRN1A-DNA</b>  | 5'-CAAACCGCTTCCATAAGGCTTTGC-3'                   | 95.0°C, 10 sec       |           | 234                  |
|                   | 5'-CAGCGATAGCAGCCGCAGAA-3'                       | 60.0°C, 30 sec       | 40 cycles |                      |

**Table B. Significantly differentially expressed mitochondrial enrich-proteins in  $\beta^0$ -thalassemia/Hb E patients in erythroblast.**

| <b>No.</b>                                                                                                     | <b>Protein best hit</b> | <b>ID detail best hit</b>                                                                        |
|----------------------------------------------------------------------------------------------------------------|-------------------------|--------------------------------------------------------------------------------------------------|
| <b>Significantly differentially up-regulated in mild <math>\beta^0</math>-thalassemia/Hb E</b>                 |                         |                                                                                                  |
| 1                                                                                                              | gi 257153303            | Disrupted in schizophrenia 1 protein isoform r [Homo sapiens]                                    |
| 2                                                                                                              | gi 91199540             | Dihydrolipoyl dehydrogenase, mitochondrial precursor [Homo sapiens]                              |
| 3                                                                                                              | gi 33636719             | Mitochondrial import inner membrane translocase subunit TIM44 [Homo sapiens]                     |
| <b>Significantly differentially up-regulated in severe <math>\beta^0</math>-thalassemia/Hb</b>                 |                         |                                                                                                  |
| 1                                                                                                              | gi 339275976            | A-kinase anchor protein 1, mitochondrial precursor [Homo sapiens]                                |
| 2                                                                                                              | gi 9955963              | ATP-binding cassette sub-family B member 6, mitochondrial [Homo sapiens]                         |
| 3                                                                                                              | gi 148491091            | calcium-binding mitochondrial carrier protein SCaMC-1 isoform 1 [Homo sapiens]                   |
| 4                                                                                                              | gi 2554941              | putative glycine-N-acyltransferase [Homo sapiens]                                                |
| 5                                                                                                              | gi 296439323            | Protein Hook homolog 2                                                                           |
| <b>Significantly differentially up-regulated in both mild and severe <math>\beta^0</math>-thalassemia/Hb E</b> |                         |                                                                                                  |
| 1                                                                                                              | gi 25306275             | 39S ribosomal protein L11, mitochondrial isoform c [Homo sapiens]                                |
| 2                                                                                                              | gi 7706057              | 39S ribosomal protein L27, mitochondrial [Homo sapiens]                                          |
| 3                                                                                                              | gi 21265093             | 39S ribosomal protein L41, mitochondrial [Homo sapiens]                                          |
| 4                                                                                                              | gi 115298648            | A/G-specific adenine DNA glycosylase isoform 2 [Homo sapiens]                                    |
| 5                                                                                                              | gi 8922701              | Acylglycerol kinase, mitochondrial precursor [Homo sapiens]                                      |
| 6                                                                                                              | gi 50345988             | ATP synthase subunit gamma, mitochondrial isoform L (liver) precursor [Homo sapiens]             |
| 7                                                                                                              | gi 7242140              | ATP-dependent Clp protease ATP-binding subunit clpX-like, mitochondrial precursor [Homo sapiens] |
| 8                                                                                                              | gi 20140441             | Autophagy-related protein 13                                                                     |
| 9                                                                                                              | gi 334302921            | Cyclin-dependent kinase 1                                                                        |
| 10                                                                                                             | gi 167860120            | Cytosolic phospholipase A2 beta [Homo sapiens]                                                   |
| 11                                                                                                             | gi 70995211             | delta(3,5)-Delta(2,4)-dienoyl-CoA isomerase, mitochondrial precursor [Homo sapiens]              |
| 12                                                                                                             | gi 187171277            | DNA polymerase subunit gamma-1 [Homo sapiens]                                                    |
| 13                                                                                                             | gi 31542783             | E3 ubiquitin-protein ligase RNF185 isoform 1 [Homo sapiens]                                      |
| 14                                                                                                             | gi 66932984             | folylpolyglutamate synthase, mitochondrial isoform a precursor [Homo sapiens]                    |
| 15                                                                                                             | gi 119592142            | hCG1644589 [Homo sapiens]                                                                        |
| 16                                                                                                             | gi 119580790            | hCG1789640 [Homo sapiens]                                                                        |
| 17                                                                                                             | gi 13435356             | HCLS1-associated protein X-1 isoform a [Homo sapiens]                                            |
| 18                                                                                                             | gi 530371623            | kinesin family member 1A isoform X7 [Homo sapiens]                                               |
| 19                                                                                                             | gi 451327636            | lon protease homolog, mitochondrial isoform 3 [Homo sapiens]                                     |
| 20                                                                                                             | gi 110349750            | malonyl-CoA decarboxylase, mitochondrial [Homo sapiens]                                          |
| 21                                                                                                             | gi 38569477             | metaxin-1 isoform 2 [Homo sapiens]                                                               |
| 22                                                                                                             | gi 22129774             | mitochondrial dynamic protein MID51 [Homo sapiens]                                               |
| 23                                                                                                             | gi 45269137             | mitofusin-1 [Homo sapiens]                                                                       |
| 24                                                                                                             | gi 215820622            | mixed lineage kinase domain-like protein isoform 2 [Homo sapiens]                                |
| 25                                                                                                             | gi 166795305            | peptide chain release factor 1-like, mitochondrial isoform b [Homo sapiens]                      |
| 26                                                                                                             | gi 5729820              | phenylalanine--tRNA ligase, mitochondrial precursor [Homo sapiens]                               |
| 27                                                                                                             | gi 315138995            | POC1 centriolar protein homolog B isoform b [Homo sapiens]                                       |
| 28                                                                                                             | gi 40807485             | pre-mRNA-processing factor 6 [Homo sapiens]                                                      |
| 29                                                                                                             | gi 88758603             | PRKCA-binding protein [Homo sapiens]                                                             |
| 30                                                                                                             | gi 167466276            | protein phosphatase 1K, mitochondrial [Homo sapiens]                                             |



|            |                         |                                                                                         |
|------------|-------------------------|-----------------------------------------------------------------------------------------|
| 31         | gi 239938842            | Queuine tRNA-ribosyltransferase                                                         |
| 32         | gi 125651               | RAF proto-oncogene serine/threonine-protein kinase                                      |
| 33         | gi 194239664            | SHC-transforming protein 1 isoform 3 [Homo sapiens]                                     |
| 34         | gi 23618867             | sideroflexin-1 [Homo sapiens]                                                           |
| 35         | gi 260763906            | stAR-related lipid transfer protein 3 isoform 3 [Homo sapiens]                          |
|            |                         |                                                                                         |
| <b>No.</b> | <b>Protein best hit</b> | <b>ID detail best hit (cont.)</b>                                                       |
| 36         | gi 156416003            | Succinate dehydrogenase [ubiquinone] flavoprotein subunit, mitochondrial [Homo sapiens] |
| 37         | gi 153090209            | syntabulin isoform d [Homo sapiens]                                                     |
| 38         | gi 417324               | Transcription factor A, mitochondrial                                                   |
| 39         | gi 306518614            | tRNA modification GTPase GTPBP3, mitochondrial isoform VII [Homo sapiens]               |
| 40         | gi 14150128             | Ubiquinol-cytochrome-c reductase complex assembly factor 2 [Homo sapiens]               |
| 41         | gi 62286592             | Ubiquitin-like modifier-activating enzyme ATG7                                          |
| 42         | gi 37999897             | Uracil-DNA glycosylase                                                                  |
